# Supplementary material for: Compassionate Conservation and the Challenge of Sustainable Wildlife Management: A Survey of the Urban Public of China
Source: MDPI journal article supplement (doi:10.3390/ani11092521), 2021-08-27
Supplement: s1 [file s1]

# Supplementary Materials: Compassionate Conservation and the challenge of Sustainable Wildlife Management: A Survey of the Urban Public of China

Zhen Miao <sup>1,†</sup>, Qiang Wang <sup>2,†</sup>, Xinyi Lu <sup>1</sup>, Dongxiao Chen <sup>1</sup>, Wei Zhang <sup>1,\*</sup>, Xuehong Zhou <sup>1,\*</sup> and Douglas C. MacMillan <sup>3</sup>

<sup>1</sup> College of Wildlife and Protected Area, Northeast Forestry University, Harbin 150040, China; miaozen43566@163.com (Z.M.); luxinyi981125@163.com (X.L.); dongxiao\_c@163.com (D.C.)

<sup>2</sup> Key Laboratory of Wetland Ecology and Environment, Northeast Institute of Geography and Agroecology, Chinese Academy of Sciences, Changchun 130102, China; qwang@neigae.ac.cn

<sup>3</sup> Durrell Institute of Conservation and Ecology (DICE), University of Kent, Canterbury, Kent CT2 7NR, UK; dcm@kent.ac.uk

\* Correspondence: zwfur@nefu.edu.cn (W.Z.); xuehong\_zhou2012@nefu.edu.cn (X.Z.)

† Equal contributions.

Received: 9 July 2021; Accepted: 23 August 2021; Published: 27 August 2021

**Table S1.** Percentage of respondents in each research area.

| Seven regions   | City                             | Number of questionnaires collected | Number of questionnaires completed |
|-----------------|----------------------------------|------------------------------------|------------------------------------|
| North China     | Beijing                          | 262                                | 200                                |
|                 | Datong                           | 139                                | 100                                |
|                 | Hangzhou                         | 183                                | 178                                |
| Eastern China   | Yantai                           | 128                                | 122                                |
|                 | Zhucheng                         | 120                                | 120                                |
|                 |                                  | 194                                | 94                                 |
| South China     | Guangzhou                        | 258 (online)                       | 206                                |
| Central China   | Wuhan                            | 115                                | 95                                 |
|                 | Zhengzhou                        | 255 (online)                       | 205                                |
|                 |                                  |                                    |                                    |
| Northeast China | Harbin                           | 213                                | 196                                |
|                 | Genhe                            | 150                                | 148                                |
|                 | Xining                           | 149                                | 133                                |
|                 | Xi'an                            | 126 (online)                       | 103                                |
| Northwest China | Xinjiang Uygur Autonomous Region | 147                                | 110                                |
|                 | He Jing County                   |                                    |                                    |
|                 |                                  |                                    |                                    |
| Southwest China | Chongqing                        | 121                                | 80                                 |
|                 | Chengdu                          | 293 (online)                       | 220                                |
|                 |                                  |                                    |                                    |
| Total           |                                  | 2853                               | 2310                               |

**Table S2.** Summary of respondent demographics.

| Demographic                         | Variable                       | N    | %    |
|-------------------------------------|--------------------------------|------|------|
| Living area                         | North China                    | 300  | 13   |
|                                     | Eastern China                  | 420  | 18.2 |
|                                     | South China                    | 300  | 13   |
|                                     | Central China                  | 300  | 13   |
|                                     | Northeast China                | 344  | 14.8 |
|                                     | Northwest China                | 346  | 15   |
|                                     | Southwest China                | 300  | 13   |
| Gender                              | Male                           | 1205 | 52.2 |
|                                     | Female                         | 1105 | 47.8 |
| Age                                 | ≤20                            | 381  | 16.5 |
|                                     | 21-30                          | 590  | 25.5 |
|                                     | 31-40                          | 587  | 25.4 |
|                                     | 41-50                          | 571  | 24.7 |
|                                     | 51-60                          | 139  | 6    |
|                                     | ≥61                            | 42   | 1.8  |
| Education                           | Junior high school and below   | 189  | 8.2  |
|                                     | High school (Secondary school) | 673  | 29.1 |
|                                     | College                        | 712  | 30.8 |
|                                     | Undergraduate degrees          | 622  | 26.9 |
|                                     | Postgraduate degree            | 114  | 4.9  |
|                                     | ≤4000                          | 962  | 41.6 |
| Monthly salary                      | 4000-6000                      | 674  | 29.2 |
|                                     | 6000-8000                      | 298  | 12.9 |
|                                     | 8000-10000                     | 182  | 7.9  |
|                                     | 10000-15000                    | 115  | 5    |
|                                     | ≥15000                         | 79   | 3.4  |
| Are you vegetarian?                 | Yes                            | 397  | 17.2 |
|                                     | No                             | 1913 | 82.8 |
| Do you have religious beliefs?      | Yes                            | 327  | 14.2 |
|                                     | No                             | 1983 | 85.8 |
| The development level of the cities | First-tier cities              | 500  | 21.6 |
|                                     | New first-tier cities          | 881  | 38.1 |
|                                     | Second-tier cities             | 318  | 13.8 |
|                                     | Third-tier cities and below    | 611  | 26.5 |

**Table S3.** Overall Attitudes of public toward sustainable wildlife management and attitudes toward seven categories of issues and twenty questions.

| Item                                                                                                |                                                                                                                            | Mean (Min, Max) |                  |
|-----------------------------------------------------------------------------------------------------|----------------------------------------------------------------------------------------------------------------------------|-----------------|------------------|
| Release                                                                                             | Q1: people should be able to release wild animals at will                                                                  | 1.105 (-3, 3)   |                  |
|                                                                                                     | Q13:wildlife should be released by professional departments or organizations                                               | 1.856 (-3, 3)   | 1.147 (-2.67, 3) |
|                                                                                                     | Q15:buying wildlife from the market and releasing them is beneficial to conservation                                       | 0.481 (-3, 3)   |                  |
| Animal Welfare and utilization of wildlife by men                                                   | Q2:animals should have equal rights with humans                                                                            | -0.844 (-3, 3)  |                  |
|                                                                                                     | Q10:advocating animal rights is more important than                                                                        | -0.504 (-3, 3)  | -0.199 (-3, 3)   |
|                                                                                                     | Q16:animal welfare should be improved in captive breeding of wildlife                                                      | 0.750 (-3, 3)   |                  |
| Utilization and Wildlife Conservation                                                               | Q3:as long as the use of wild animals and their products is prohibited, wild animals can be effectively conserved          | -0.415 (-3, 3)  |                  |
|                                                                                                     | Q18:all wild animals and their products, including captive breeding of wild animals and their products, should not be used | -0.095 (-3, 3)  | -0.255 (-3, 3)   |
|                                                                                                     | Q4:if wild populations are not threatened, we can use wildlife and their products to improve people's quality of life      | -0.663 (-3, 3)  |                  |
| Wildlife Management                                                                                 | Q8:the standard of living of residents around the wildlife distribution area should be considered in wildlife conservation | 1.096 (-3, 3)   | 0.828 (-2.67, 3) |
|                                                                                                     | Q20:wildlife management should be based on science                                                                         | 2.051 (-3, 3)   |                  |
|                                                                                                     | Q5:vegetarianism is not an effective way to conserve and manage wildlife                                                   | 1.225 (-3, 3)   |                  |
| Vegetarianism and Wildlife Conservation                                                             | Q11:vegetarianism is closely related to wildlife conservation                                                              | 0.230 (-3, 3)   | 0.763 (-3, 3)    |
|                                                                                                     | Q17:wild animals can be effectively conserved if all the human beings are vegans                                           | 0.836 (-3, 3)   |                  |
|                                                                                                     | Q6:if all men have a positive attitude about wildlife, wildlife can be effectively conserved                               | 1.763 (-3, 3)   |                  |
| Public and Wildlife Conservation                                                                    | Q14:wildlife can be conserved as long as given care and love                                                               | -0.440 (-3, 3)  | 1.157 (-2, 3)    |
|                                                                                                     | Q19:no matter how enthusiastic we care about wildlife, we still need scientific methods for its conservation               | 2.148 (-3, 3)   |                  |
|                                                                                                     | Q7:trophy hunting is cruel and inhumane to animals                                                                         | -1.348 (-3, 3)  |                  |
| Trophy Hunting                                                                                      | Q9:well-managed trophy hunting is one of the effective measures for wildlife conservation and management                   | -0.352 (-3, 3)  | -0.475 (-3.3)    |
|                                                                                                     | Q12:well-managed hunting opportunities should be provided for those who want to hunt                                       | 0.276 (-3, 3)   |                  |
| Total average score of the public attitudes toward SWM and wildlife conservation: 0.458 (-1.3, 2.9) |                                                                                                                            |                 |                  |
